# Supplementary material for: Single-cell full-length total RNA sequencing uncovers dynamics of recursive splicing and enhancer RNAs
Source: PubMed Central journal article supplement (PMC5809388; doi:10.1038/s41467-018-02866-0), 2018-02-12
Supplement: 41467_2018_2866_MOESM3_ESM.pdf [file 41467_2018_2866_MOESM3_ESM.pdf]

## Description of Additional Supplementary Files

File Name: Supplementary Data 1

Description: Functional term enrichment analysis using MetaScape.

File Name: Supplementary Data 2

Description: List of qRT-PCR primers.

File Name: Supplementary Data 3

Description: List of not-so-random primers.

File Name: Supplementary Data 4

Description: : List of non-poly(A) RNAs.

File Name: Supplementary Data 5

Description: List of poly(A) RNAs.

File Name: Supplementary Data 6

Description: Mouse ribosomal RNA sequences.
